1  
2  
3  
4  
5  
6  
7  
8  
9  
10  
11  
12  
13  
14  
15  
16  
17  
18  
19  
20  
21  
22  
23  
24  
25  
26  
27  
28

**Title:** Supra-second interval timing deficits and abnormal frontal theta oscillations in individuals with bipolar disorder

**Running title:** Bipolar and timing

Victória A. Müller Ewald<sup>\*a</sup>, Nicholas T. Trapp<sup>\*a</sup>, McCall E. Sarrett<sup>h</sup>, Benjamin D. Pace<sup>a</sup>, Jenny G. Richards<sup>g</sup>, Ilisa K. Gala<sup>a</sup>, Jacob N. Miller<sup>i</sup>, Jan R. Wessel<sup>c,d</sup>, Vincent A. Magnotta<sup>a,g</sup>, John A. Wemmie<sup>a,e,f</sup>, Aaron D. Boes<sup>a,b</sup>, Krystal L. Parker<sup>a^</sup>

<sup>a</sup> Department of Psychiatry, <sup>b</sup> Department of Pediatrics, <sup>c</sup> Department of Psychological & Brain sciences, <sup>d</sup> Department of Neurology, <sup>e</sup> Department of Molecular Physiology and Biophysics, <sup>f</sup> Department of Neurosurgery, <sup>g</sup> Department of Radiology, The University of Iowa, Iowa City, Iowa, United States of America; <sup>h</sup> Department of Psychological and Brain sciences, Villanova University, Villanova, Pennsylvania, United States of America; <sup>i</sup> St. Luke's Hospital, Cedar Rapids, Iowa, United States of America

\*Both authors contributed equally to the development and publication of this work.

<sup>^</sup>Corresponding author: *Address:* 200 Hawkins Drive W276GH, Iowa City, IA 52242-1057,

*Email:* [krystal-parker@uiowa.edu](mailto:krystal-parker@uiowa.edu), *Phone:* (319) 353-4554

29 **Acknowledgements:** The authors would like to acknowledge Laren Garrett for her excellent  
30 technical assistance.

31

32 **Funding:** Bipolar Disorders Research Program of Excellence via the University of Iowa Roy J.  
33 Carver Charitable Trust and the University of Iowa Neuroscience Institute

34

35

36

37

38 Abstract

39 **Objectives:** Though widely reported by patients, cognitive symptoms associated with bipolar  
40 disorder (BD), including deficits in executive function, memory, attention, and timing are under-  
41 studied. Work suggests that individuals with BD show impairments in sub-second interval timing  
42 tasks (ITT), however, results have been inconclusive regarding supra-second time perception in  
43 BD patients. Additionally, the effects of mood or medication status on time perception in BD  
44 patients are debated in the literature.

45 **Methods:** To address this, the present work administered a supra-second ITT concurrent with  
46 electroencephalographic (EEG) recordings to patients with BD and neuronormative controls. As  
47 this task is known to elicit frontal theta oscillations, which can be abnormal in psychiatric  
48 populations, signal from the Fz lead was analyzed at rest and during the task.

49 **Results & Conclusions:** As hypothesized, results suggest that individuals with BD show  
50 impairments in supra-second ITT performance compared to neuronormative controls. Frontal  
51 theta power was also reduced compared to controls during the ITT but not during rest. Finally,  
52 timing impairments remain detectible in BD patients independent of mood state and use of  
53 antipsychotic medication. This suggests that supra-second interval timing deficits are a key  
54 characteristic observed in BD. Together with previous work, these findings point to critical  
55 timing impairments in BD patients across a wide range of timing modalities and durations.

56

57

58 **Key words:** Cognition, Bipolar disorder, Medication status, Depression, Antipsychotic

59

60 Introduction

61 The diagnosis and treatment for bipolar disorder (BD) focuses largely on mood symptoms<sup>1-4</sup>.

62 However, changes in cognitive functioning, including deficits in prospective memory, working

63 memory, executive function, attention, planning, and timing<sup>5-7</sup>, are common and may even

64 precede a formal BD diagnosis<sup>8</sup>. Cognitive symptoms are reported by both patients with bipolar I

65 disorder (BDI) and bipolar II disorder (BDII), and are present even when individuals are in a

66 euthymic state<sup>9</sup>. Thus, it is imperative that we develop a better understanding of the cognitive

67 symptoms associated with BD, as they are both linked to a lower quality of life<sup>10</sup> and widely

68 reported by patients.

69 Reports suggest that some cognitive impairments in BD can recede with the treatment of mood

70 symptoms<sup>11</sup>. However, other cognitive symptoms, such as impairments in verbal memory and

71 sustained attention, persist or worsen following mood symptom treatment<sup>11,12</sup>. It has been

72 proposed that impairments on measures of general intellectual functioning, working memory,

73 and cognitive set-shifting are associated with antipsychotic medication use in BD patients<sup>6</sup>.

74 These deficits may be attributable to anti-psychotic induced reductions in information processing

75 speed. Understanding how time processing is altered in BD patients, especially as a function of

76 mood or medication status, would be directly informative to this debate.

77 Previous work suggests that individuals with BD show impaired performance in sub-second

78 interval timing tasks (ITT)<sup>13,14</sup>. Additionally, individuals with BD show abnormal acquisition of

79 single-cue delay eye blink conditioning, indicating deficits in implicit motor timing<sup>15</sup>. Interval

80 timing is dependent on activity in diffuse neural networks including the cerebello-thalamo-

81 cortical network and the cortico-striatal network<sup>16,17</sup>. Work also indicates that abnormalities in

82 nodes of these networks which are necessary for interval timing are involved in the

83 pathophysiology of BD. Such areas include the frontal cortex, thalamus, and cerebellum<sup>18-22</sup>.  
84 Despite well-characterized abnormalities in sub-second timing, it is unclear if individuals with  
85 BD also present deficits in supra-second timing. Two studies have explored this question,  
86 suggesting impairments compared to neuronormative controls<sup>23,24</sup>. However, the population in  
87 these studies included individuals with schizophrenia (SCZ) as well as individuals with  
88 depression and BD, confounding the interpretation of timing deficits in BD specifically.

89 Cognitive impairments in SCZ are well characterized and include impairments in executive  
90 function, timing, and verbal memory<sup>4</sup>. Previous work from our laboratory suggests that  
91 impairments in supra-second interval timing correlate with abnormal fronto-central theta  
92 oscillations in patients with SCZ<sup>25,26</sup>. Work suggest significant genetic and symptomatic overlap  
93 between SCZ and BD<sup>4,12</sup>. For example, BD patients suffering from mania commonly present  
94 with Schneiderian first-rank symptoms, including delusions and hallucinations. Additionally,  
95 patients with SCZ may also present with depression or mania<sup>4</sup>. However, it is unclear if the  
96 deficits in timing and frontal oscillations observed in SCZ will also extend to BD.

97 To address these questions, we administered a supra-second ITT to participants with BD and  
98 neuronormative controls (CT) while simultaneously recording electroencephalographic (EEG)  
99 activity. We hypothesized that individuals with BD would show impaired supra-second ITT  
100 performance and reduced frontal theta power compared to the CT group. Participants with BD I  
101 and BD II were included in the present study to characterize possible differences between these  
102 two populations. Given the similar cognitive profiles between the two patient populations, we  
103 did not expect to find differences in ITT performance between the BD I and BD II groups<sup>9</sup>.  
104 Finally, we assessed differences in ITT performance and frontal theta in BD depending on mood  
105 or medication status.

106 Methods

107 **Subjects**

108 Twenty-four participants (20 females, 4 males) with a DSM-IV diagnosis of BDI (16 subjects) or  
109 BDII (8 subjects) were recruited from the Iowa Longitudinal Database (see **Table 1** for  
110 demographic information and **Table 2** for comorbidities). All subjects had diagnoses confirmed  
111 by a board-certified psychiatrist at the University of Iowa Hospitals & Clinics. Medication status  
112 was stable for a minimum of 30 days prior to enrollment and was not altered for the present  
113 study (**Table 3**). Individuals who reported illicit drug use within 6 months of study  
114 commencement were excluded from participation. Mood was assessed with the Montgomery-  
115 Asberg depression rating scale and a depressed state was defined as a score greater than 6<sup>27</sup>. Six  
116 CT subjects were included as a neuronormative comparison group. CT subjects did not have a  
117 history of neuropsychiatric disorders. In accordance with federal and institutional guidelines, all  
118 procedures including informed consent were approved by the University of Iowa Institutional  
119 Review Board and are in accordance with the Declaration of Helsinki.

120

121 **Tasks**

122 *Interval timing task*

123 Concurrent with EEG acquisition, participants performed a supra-second ITT (**Figure 1A**).  
124 Participants completed the task sitting in front of a Dell 20" monitor with a 60 Hz refresh rate.  
125 White times new roman size 40 text appeared on a black background in the middle of the screen.  
126 Participants received verbal instructions on how to perform the task from the experimenter and  
127 read the same set of instructions on the computer screen. As is customary for this task, all

128 participants were instructed not to count time in their head. To start each trial, a number which  
129 indicated the interval to be estimated by the participant (“3” for the short interval/SIT or “12” for  
130 the long interval/LIT) appeared on the screen. Participants pressed the space bar on the task  
131 computer to start the trial and to indicate their judgement of the elapsed interval thus ending the  
132 trial. Feedback about response accuracy was shown for every trial immediately following the  
133 button press. Feedback consisted of the following information: “you were x.xxx seconds  
134 early/late.” Participants pressed the space bar to initiate the next trial. The experiment consisted  
135 of a total of 80 trials (40 SIT trials & 40 LIT trials) presented in pseudo-random order.

### 136 *Resting state task*

137 Resting-state recordings lasted 5 minutes, during which participants sat in a chair, were  
138 instructed to keep their eyes open, look forward, and to let their mind wander.

139

### 140 **EEG acquisition**

141 A BrainVision 64-channel active electrode system with Ag/AgCl electrodes was used to collect  
142 EEG (Morrisville, NC). A custom-made electrode cap was utilized, which included electrode  
143 placements that are not typical of the International 10-20 system<sup>28</sup>. Specifically, electrodes PO3  
144 and PO4 were substituted by electrodes I1 and I2 which flanked the Iz electrode. These were  
145 situated at the back of the head over the inion, below O1, Oz, and O2. At the beginning of the  
146 recordings, impedances were reduced using high viscosity electrode gel for active electrodes  
147 (EASYCAP, Munich, Germany). Impedance for all electrodes was kept at or below 15 k $\Omega$  for  
148 the duration of the recording. Data were acquired at 500 Hz and referenced online to Pz.

### 149 **EEG analyses**

150 More detailed analysis information can be found in the sub-sections below. In brief, analyses  
151 focused on electrode Fz, as frontal theta oscillations are typically maximal at this electrode<sup>29</sup>.  
152 Frequency bands were defined as follows: delta (1-4 Hz), theta (4-8 Hz), alpha (8-13 Hz), beta  
153 (13-30 Hz), and gamma (30-50 Hz). For exploratory analyses, the frequency-space assessed was  
154 between 1 and 50Hz. The time-window assessed for the short interval was from cue-onset to 3 s  
155 post-cue. The time-window assessed for the long interval was from cue-onset to 12 s post-cue.  
156 For region of interest (ROI)-based analyses the frequency space assessed was from 4 to 8 Hz  
157 (theta band) and the time-window analyzed was the 500 ms following the timing-cue onset.

### 158 *Preprocessing*

159 Data were preprocessed using custom MATLAB scripts based on EEGLAB<sup>30</sup> functions. Data  
160 were high-pass filtered at 1Hz, then low-pass filtered at 50Hz, the transition bandwidth was set  
161 to twice the cutoff frequency (-6 dB) for cutoff  $\leq$  1Hz and 25% cutoff frequency for cutoff  $>$  8  
162 Hz. Nonstereotypic artifacts were removed manually, which resulted in the exclusion of 18% of  
163 trials on average. Next, continuous data were rereferenced offline to the average voltage.  
164 Eyeblinks and saccades were removed using independent component analysis. Finally, data were  
165 epoched as follows: for short interval cue presentation, data were epoched from 1 second before  
166 cue presentation to 5 seconds after cue presentation. For long interval cue presentation, data were  
167 epoched from 1 second before cue presentation to 15 seconds after cue presentation. For  
168 responses, data were epoched from 1 second before the response to 1 second after the response.

### 169 *Non time-locked analyses*

170 To assess high-level differences between BD and CT groups during the task and at rest, non-  
171 time-locked analyses were conducted using the fast-Fourier transform method. Relative power at



172 each frequency band was defined as the proportion of the overall spectral power distribution area  
173 occupied by that frequency band. This was quantified using the MATLAB function trapz. For  
174 ITT task analyses, short and long interval trials were epoched as described above and analyzed  
175 together. For resting-state analyses, continuous data were epoched into 20s intervals.

#### 176 *Time-locked analyses*

177 Time-locked analyses were conducted on ITT task data via Morlet wavelet convolution to assess  
178 oscillatory activity during specific task epochs. In brief, the power spectrum for each trial was  
179 convolved with complex Morlet wavelets with a width of 7 cycles, one wavelet for each  
180 frequency (1 to 50 Hz). Power values were baseline normalized by conversion to the decibel  
181 (dB) scale ( $10 \cdot \log_{10}(\text{power epoch}/\text{power baseline})$ ). The 250 ms window from -400 to -150 ms  
182 prior to the presentation of the timing cue was utilized as the baseline for both cue and response-  
183 centered analyses.

184

#### 185 **Statistical analyses**

186 For ITT performance analyses, participants' time estimates for the SIT/LIT intervals were fit  
187 with Gaussian distributions using custom-written MATLAB routines (MathWorks, Natick, MA).  
188 Timing accuracy and precision were estimated by calculating peak time and CV measures for  
189 each participant, respectively. The peak time index represents the accuracy of participants'  
190 responses and was calculated using the best fit estimate of the Gaussian distribution. The CV  
191 index represents the precision of participants' responses and was calculated by dividing the  
192 response standard deviation by peak time.

193

194 Exploratory analyses of neural oscillations were conducted in MATLAB using t-tests. A simple  
195 false-discovery rate correction was used for cell-by-cell comparison of spectral activity over  
196 time. ROI-based analyses of neural oscillations and interval timing task performance were  
197 conducted in GraphPad Prism (San Diego, California). T-tests were used for comparisons across  
198 two groups. One-way ANOVAs were used for comparisons across three groups. Multiple  
199 comparisons were corrected for using Tukey's multiple comparisons test. Statistical outliers were  
200 defined as individuals with scores 2 standard deviations above/below their group mean and  
201 excluded from the analysis. For analyses where outliers were excluded, the number of  
202 individuals excluded and which group they belonged to are noted in the results section.

203

204 Results

205 As individuals with BDI and BDII did not differ in ITT performance or frontal theta power  
206 (**Supplemental Figure 1**), groups were combined for the main analyses below.

207

208 **Interval timing performance differences between CT and BD groups**

209 During the supra-second ITT (**Figure 1A**) individuals with BD showed impaired performance  
210 compared to the CT group (**Figure 1B**). For the short interval, individuals with BD show an  
211 over-estimation of the target duration compared to the CT group, as quantified by the peak time  
212 index ( $t_{(27)} = 2.61, p = 0.0146$ , one BD outlier excluded, **Figure 1C [left]**). Response  
213 distribution, quantified by the CV index, does not differ between groups ( $t_{(27)} = 1.338, p =$   
214  $0.1920$ , one BD outlier excluded, **Figure 1C [right]**). For the long interval, peak response times  
215 do not differ between BD and CT groups ( $t_{(28)} = 1.576, p = 0.1262$ , **Figure 1D[left]**). However,  
216 individuals with BD showed significantly lower CV indices, indicating higher variability in  
217 response times compared to the CT group ( $t_{(27)} = 3.345, p = 0.0024$ , one BD outlier excluded,  
218 **Figure 1D[right]**).

219

220 **Frontal theta differences between CT and BD groups**

221 Whole head EEG recordings were acquired with data analysis focusing on the Fz electrode  
222 (**Figure 2A, red**).

223 *Task-wide differences – ITT*

224 To assess task-wide differences in oscillatory activity between BD and CT groups, spectral  
225 activity during all trial epochs (SIT + LIT) was quantified (**Figure 2B**). During the ITT,

226 individuals with BD showed lower frontal theta power compared to the CT group ( $t_{(27)} = 2.992$ ,  $p$   
227  $= 0.0059$ , one BD outlier excluded, **Figure 2C**). Although it can be observed that the theta power  
228 values of a single CT subject are higher than the remainder of the CT subjects, data from this  
229 individual were not excluded as they do not fit the statistical outlier criteria as described in the  
230 methods section. Differences in power during the ITT were not observed in other frequency  
231 bands (**Supplemental Figure 2**).

### 232 *Task-wide differences – Resting state*

233 To assess if differences in theta power between BD and CT groups were diffuse or task-specific,  
234 resting-state data were analyzed (**Figure 2D**). There were no significant differences in theta  
235 power between BD and CT groups ( $t_{(30)} = 0.8343$ ,  $p = 0.4107$ , one CT & one BD outlier  
236 excluded, **Figure 2E**) during rest.

237 Because our group has shown that theta power immediately following timing-cue onset  
238 correlates to ITT performance<sup>25</sup>, we next examined time-locked activity.

### 239 *Time-locked analyses – Short interval*

240 Data were epoched surrounding the presentation of the short interval timing cue (**Figure 3A**).  
241 Averaged spectrograms were created for individuals in the CT group (**Figure 3B [left]**) and the  
242 BD group (**Figure 3B [right]**). Exploratory analyses suggest that oscillatory activity does not  
243 differ between groups. ROI-based analyses suggest that post-cue theta power did not  
244 significantly differ between groups ( $t_{(24)} = 1.911$ ,  $p = 0.0680$ , one BD outlier excluded, **Figure**  
245 **3C**).

246 Data were next epoched surrounding the button press indicating the participants' estimation of  
247 short interval duration (**Figure 3D**). Averaged spectrograms were created for individuals in the

248 CT group (**Figure 3E[left]**) and the BD group (**Figure 3E[right]**). Exploratory analyses suggest  
249 that oscillatory activity did not differ between groups. ROI-based analyses suggest that neither  
250 pre-response nor post-response theta power differed between groups ( $t_{(27)} = 1.556, p = 0.1313$ ,  
251 one BD outlier excluded, **Figure 3F**;  $t_{(25)} = 0.2206, p = 0.8272$  one CT outlier and & BD outliers  
252 excluded, **Figures 3G**).

### 253 *Time-locked analyses – Long interval*

254 Data were epoched surrounding the presentation of the long interval timing cue (**Figure 4A**).  
255 Averaged spectrograms were created for individuals in the CT group (**Figure 4B [left]**) and the  
256 BD group (**Figure 4B [right]**). Exploratory analyses suggest that oscillatory activity did not  
257 differ between groups. ROI-based analyses suggest that post-cue theta power did not differ  
258 between groups ( $t_{(24)} = 1.663, p = 0.1094$ , one BD outlier excluded, **Figure 4C**).

259 Data were next epoched surrounding the button press indicating the participants' estimation of  
260 long interval duration (**Figure 4D**). Averaged spectrograms were created for individuals in the  
261 CT group (**Figure 4E[left]**) and the BD group (**Figure 4E[right]**). Exploratory analyses suggest  
262 that oscillatory activity did not differ between groups. ROI-based analyses suggest that  
263 individuals in the BD group showed lower theta power compared to the CT group before ( $t_{(27)} =$   
264  $3.946, p = 0.0005$ , one BD outlier excluded, **Figure 4F**) and after ( $t_{(27)} = 2.852, p = 0.0082$ , one  
265 BD outlier excluded, **Figures 4G**) the response.

266

### 267 **Timing performance and frontal theta within BD sub-groups**

268 Because a lacuna exists in the literature regarding how mood symptoms and medication status  
269 affect cognitive symptoms associated with BD, our next set of planned analyses focused on  
270 differences in timing performance and frontal theta between sub-groups of individuals with BD.

271 The epoch of data analyzed included the entirety of the ITT (**Figure 5A**). Response curves  
272 suggest that supra-second ITT performance is not significantly associated with differences mood  
273 state (**Figure 5B**). Peak time and CV indices did not differ between groups for the short interval  
274 (Peak time:  $t_{(20)} = 0.05827$ ,  $p = 0.9541$ ; CV:  $t_{(21)} = 0.3629$ ,  $p = 0.7203$ , one BD outlier excluded,  
275 **Figure 5C**) or the long interval (Peak time:  $t_{(21)} = 1.333$ ,  $p = 0.1969$ ; CV:  $t_{(21)} = 0.3012$ ,  $p =$   
276  $0.7662$ , **Figure 5D**). Frontal theta power also did not differ between groups as shown in **Figure**  
277 **5E** ( $t_{(20)} = 0.1963$ ,  $p = 0.8463$ , one BD outlier excluded).

278 The epoch of data analyzed included the entirety of the ITT (**Figure 5F**). Response curves  
279 suggest that supra-second ITT performance is not significantly associated with differences in  
280 antipsychotic medication status use (**Figure 5G**). Peak time and CV indices did not differ  
281 between groups for the short interval (Peak time:  $t_{(20)} = 0.1367$ ,  $p = 0.8927$ ; CV:  $t_{(22)} = 0.1525$ ,  $p$   
282  $= 0.8802$ , **Figure 5H**) or the long interval (Peak time:  $t_{(21)} = 0.2647$ ,  $p = 0.7938$ , one BD outlier  
283 excluded; CV:  $t_{(21)} = 0.02555$ ,  $p = 0.9799$ , one BD outlier excluded, **Figure 5I**). Frontal theta  
284 power during the ITT also did not differ between groups **Figure 5J** ( $t_{(21)} = 1.284$ ,  $p = 0.2133$ , one  
285 BD outlier excluded).

286

287

288 Discussion

289 The objective of the present work was to assess supra-second ITT performance in individuals  
290 with BD. Results suggest that task performance was impaired in the BD group compared to the  
291 CT group. Additionally, frontal theta power in the BD group during the ITT, was significantly  
292 lower than that in the CT group. We also examined if mood state or medication status affected  
293 ITT performance within the BD group. Results suggest that neither ITT performance nor frontal  
294 theta were significantly different in association with these factors.

295

296 **Neuroanatomy of interval timing and what this suggests about the pathophysiology of BD**

297 For decades, neuropsychologists have used behavioral testing to identify which brain  
298 regions/networks subserve differential functioning in the brains of patients. However, using the  
299 results of ITT performance to triangulate *single regions* which are abnormal in BD presents a  
300 challenge, as the neuroanatomy of time processing is famously diffuse<sup>17</sup>. Indeed, no single brain  
301 region processes the passage of time, rather, this ability comes from the coordinated functioning  
302 of a network involving multiple brain regions and neurotransmitter systems.

303 One possible neural mechanism underlying the altered ITT performance observed in the present  
304 work is the abnormal functioning of the dopamine system in individuals with BD. Indeed, the  
305 dopamine hypothesis of BD, which proposes intrinsic dysregulation of dopamine receptor  
306 transporter homeostasis in patients<sup>3,31</sup>, is widely used to explain the pathophysiology associated  
307 with the disorder. Additionally, abnormalities in supra-second interval processing have been  
308 reported in other neuropsychiatric conditions where alterations of dopaminergic pathways play  
309 an important role, including SCZ, Parkinson's disease and Huntington's disease<sup>17</sup>.

310 Another possible neural mechanism subserving the ITT performance and the frontal theta deficits  
311 identified in the present work are the well-characterized frontal cortical abnormalities observed  
312 in individuals with BD including reductions in cortical grey matter<sup>18,32</sup>. Indeed, compromised  
313 frontal cortical activity has been linked to abnormalities in supra-second interval timing<sup>17</sup>.  
314 Interestingly, more recent work has also identified cerebellar abnormalities in BD including  
315 altered cerebellar metabolism<sup>19</sup>, reduced vermal volume, reduced cerebellar grey matter<sup>18</sup>,  
316 abnormal cerebello-frontal connectivity<sup>20</sup>, and reduced neurotrophic signaling<sup>21</sup>. A substantial  
317 body of work suggests that the cerebellum is a key region in sub-second interval timing<sup>33-35</sup>.  
318 Additionally, recent work suggests that cerebellar activity is also related to supra-second interval  
319 timing<sup>25,36</sup>. Because of the wide-ranging impairments individuals with BD show in interval  
320 timing, from implicit motor, to sub-second to supra-second, further work should explore if  
321 modulation of cerebellar activity in BD could rescue these deficits.

322

### 323 **Frontal theta abnormalities during the ITT**

324 Previous work from our group suggests that reduced theta power in the 500ms following timing-  
325 cue presentation is related to abnormal supra-second ITT performance in SCZ patients<sup>25</sup>.  
326 Because of the genetic and symptomatic overlap between SCZ and BD<sup>4</sup>, we hypothesized that  
327 individuals with BD would show similar impairments. Indeed, the present work identified  
328 abnormalities in ITT performance and in theta power in BD patients; however, oscillatory  
329 abnormalities were not time-locked to the post-cue interval as they were in SCZ. Instead, our  
330 work suggests that, while theta power increased during the performance of the ITT compared to  
331 rest for the CT group, as is expected, no such increase was seen in the BD group.



332 Differences in how frontal theta abnormalities present between SCZ and BD groups might be  
333 linked to differences in extent and type of cognitive impairments between the two disorders, as  
334 well as differences in the extent of neuropathological changes associated with each disorder.  
335 Relatively global cognitive impairments and diffuse brain volume reductions<sup>37</sup> accompany SCZ;  
336 indeed, some researchers propose that this may be the core pathology underlying the condition<sup>4</sup>.  
337 Conversely, in BD, the cognitive impairments and neuropathological abnormalities are less well  
338 characterized, less severe, and may affect different domains than in SCZ<sup>4,7</sup>. It is thus reasonable  
339 to conclude that the neural basis of these cognitive impairments is condition-specific and  
340 produces distinct differences in the timing of oscillatory activity. Indeed, differences in EEG  
341 oscillatory activity are seen between groups of patients with SCZ and BD during other tasks and  
342 at rest<sup>38</sup>. Further investigation into these disorder-specific EEG abnormalities could result in  
343 interesting diagnostic and neuropathological insights.

344 One surprising finding from the present dataset is that individuals with BD showed lower theta  
345 power surrounding the response for the long interval, but not the short interval. Task  
346 performance data indicate that the types of impairments shown by individuals with BD differ  
347 between short and long intervals. For short interval, participants show altered accuracy, while for  
348 the long interval participants show altered precision. This is not an uncommon finding, as the  
349 long interval is more difficult to estimate. These results could indicate that frontal theta power is  
350 more closely linked with response distribution (precision) than response accuracy. However,  
351 further work is necessary at this point to substantiate this claim.

352

353 **Trait vs. state cognitive abnormalities in BD**

354 Debate exists in the literature regarding which cognitive impairments associated with BD are  
355 state dependent, i.e. dependent on mood or medication status, and which are trait characteristics  
356 of BD. Our results indicate that supra-second timing performance is not altered as a function of  
357 mood or antipsychotic medication status, thus suggesting that deficits in supra-second interval  
358 timing might be a trait marker of BD. Together with previous work indicating that individuals  
359 with BD show impairments in sub-second<sup>13,15</sup> and implicit motor timing<sup>14</sup>, results suggest that  
360 altered ability to assess the passage of time across all time scales is a key trait of BD.

361

362

363

364 Works Cited

- 365 1. Schaffer A, Isometsa ET, Tondo L, et al. Epidemiology, neurobiology and  
366 pharmacological interventions related to suicide deaths and suicide attempts in  
367 bipolar disorder: Part I of a report of the International Society for Bipolar Disorders  
368 Task Force on Suicide in Bipolar Disorder. *Aust N Z J Psychiatry*. 2015;49(9):785-  
369 802.
- 370 2. Scaini G, Valvassori SS, Diaz AP, et al. Neurobiology of bipolar disorders: a review  
371 of genetic components, signaling pathways, biochemical changes, and  
372 neuroimaging findings. *Braz J Psychiatry*. 2020;42(5):536-551.
- 373 3. Ashok AH, Marques TR, Jauhar S, et al. The dopamine hypothesis of bipolar  
374 affective disorder: the state of the art and implications for treatment. *Mol*  
375 *Psychiatry*. 2017;22(5):666-679.
- 376 4. Murray RM, Sham P, Van Os J, Zanelli J, Cannon M, McDonald C. A developmental  
377 model for similarities and dissimilarities between schizophrenia and bipolar  
378 disorder. *Schizophr Res*. 2004;71(2-3):405-416.
- 379 5. Zhou FC, Wang YY, Zheng W, et al. Prospective memory in bipolar disorder: A  
380 meta-analysis. *Psychiatry Res*. 2018;259:184-190.
- 381 6. Frangou S. The Maudsley Bipolar Disorder Project. *Epilepsia* 2005;46:19-25.
- 382 7. Goldberg TE. Some fairly obvious distinctions between schizophrenia and bipolar  
383 disorder. *Schizophrenia Research* 1999;39:127-132.
- 384 8. Hinrichs KH, Easter RE, Angers K, et al. Influence of cognitive reserve on  
385 neuropsychological functioning in bipolar disorder: Findings from a 5-year  
386 longitudinal study. *Bipolar Disord*. 2017;19(1):50-59.
- 387 9. King S, Stone JM, Cleare A, Young AH. A systematic review on neuropsychological  
388 function in bipolar disorders type I and II and subthreshold bipolar disorders-  
389 something to think about. *CNS Spectr*. 2019;24(1):127-143.
- 390 10. Brissos SVD, V.; Kapczinski, F. Cognitive performance and quality of life in bipolar  
391 disorder *Can J Psychiatry* 2008;53(8):517-524.
- 392 11. Clark L, Iversen SD, Goodwin GM. Sustained attention deficit in bipolar disorder. *Br*  
393 *J Psychiatry*. 2002;180:313-319.
- 394 12. Tham AE, K.; Mathe, A. A.; Johnson, L.; Olsson, E.; Aberg-Wistedt, A. Impaired  
395 Neuropsychological Performance in Euthymic Patients with Recurring Mood  
396 Disorders. *Journal of Clinical Psychiatry* 1996;58(1):26-29.
- 397 13. Bolbecker AR, Westfall DR, Howell JM, et al. Increased timing variability in  
398 schizophrenia and bipolar disorder. *PLoS One*. 2014;9(5):e97964.
- 399 14. Bolbecker AR, Hong SL, Kent JS, et al. Paced finger-tapping abnormalities in bipolar  
400 disorder indicate timing dysfunction. *Bipolar Disord*. 2011;13(1):99-110.
- 401 15. Bolbecker ARM, C.; Johannesen, J. K.; Edwards, C. R.; O'Donnell, B. F.; Shekhar, A.;  
402 Nurnberger, J. I.; Steinmetz, J. E.; Hetrick, W. P. Eyeblink conditioning anomalies

- 403 in bipolar disorder suggest cerebellar dysfunction. *Bipolar Disord.* 2009;11(1):19-  
404 32.
- 405 16. Grondin S. Timing and time perception: a review of recent behavioral and  
406 neuroscience findings and theoretical directions. *Atten Percept Psychophys.*  
407 2010;72(3):561-582.
- 408 17. Buhusi CV, Meck WH. What makes us tick? Functional and neural mechanisms of  
409 interval timing. *Nat Rev Neurosci.* 2005;6(10):755-765.
- 410 18. Moorhead TW, McKirdy J, Sussmann JE, et al. Progressive gray matter loss in  
411 patients with bipolar disorder. *Biol Psychiatry.* 2007;62(8):894-900.
- 412 19. Shaffer JJ, Jr., Willour V, Fiedorowicz JG, et al. Distinct patterns of altered  
413 quantitative T1rho and functional BOLD response associated with history of  
414 suicide attempts in bipolar disorder. *Brain Imaging Behav.* 2022;16(2):820-833.
- 415 20. Shinn AK. Aberrant cerebellar connectivity in bipolar disorder with psychosis.  
416 *Biological Psychiatry Cognitive Neuroscience Neuroimaging.* 2017.
- 417 21. Soontornniyomkij B, Everall IP, Chana G, Tsuang MT, Achim CL, Soontornniyomkij  
418 V. Tyrosine kinase B protein expression is reduced in the cerebellum of patients  
419 with bipolar disorder. *J Affect Disord.* 2011;133(3):646-654.
- 420 22. Hibar DP, Westlye LT, van Erp TG, et al. Subcortical volumetric abnormalities in  
421 bipolar disorder. *Mol Psychiatry.* 2016;21(12):1710-1716.
- 422 23. Bschor TI, M.; Bauer, M.; Lewitzka, U.; Skerstupeit, M.; Muller-Oerlinghausen, B.;  
423 Baethge, C. Time experience and time judgement in major depression, mania and  
424 healthy subjects. A controlled study of 93 subjects. *Acta Psychiatr Scand.*  
425 2004;109:222-229.
- 426 24. Mahlberg R, Kienast T, Bschor T, Adli M. Evaluation of time memory in acutely  
427 depressed patients, manic patients, and healthy controls using a time  
428 reproduction task. *Eur Psychiatry.* 2008;23(6):430-433.
- 429 25. Singh A, Trapp NT, De Corte B, et al. Cerebellar Theta Frequency Transcranial  
430 Pulsed Stimulation Increases Frontal Theta Oscillations in Patients with  
431 Schizophrenia. *Cerebellum.* 2019;18(3):489-499.
- 432 26. Parker KL, Kim YC, Kelley RM, et al. Delta-frequency stimulation of cerebellar  
433 projections can compensate for schizophrenia-related medial frontal dysfunction.  
434 *Mol Psychiatry.* 2017;22(5):647-655.
- 435 27. Montgomery SA, Asberg M. A new depression scale designed to be sensitive to  
436 change. *Br J Psychiatry.* 1979;134:382-389.
- 437 28. Klem GH, Lüders HO, Jasper HH, Elger C. The ten-twenty electrode system of the  
438 International Federation. The International Federation of Clinical Neurophysiology.  
439 *Electroencephalography and clinical neurophysiology Supplement.* 1999;52:3-6.
- 440 29. Shinomia SU, Y., Nagata, K., Takahashi, N.; Inoue, R. Frontal midline theta rhythm:  
441 differentiating the physiological theta rhythm from the abnormal discharge. *Clin*  
442 *Electroencephalography.* 1994;25(1):30-35.

- 443 30. Delorme A, Makeig S. EEGLAB: an open source toolbox for analysis of single-trial  
444 EEG dynamics including independent component analysis. *J Neurosci Methods*.  
445 2004;134(1):9-21.
- 446 31. Wittenborn JR. Deductive approaches to the catecholamine hypothesis of  
447 affective disorders. *Journal of Nervous and Mental Disease*. 1974;158(5):320-324.
- 448 32. Michel CM, Koenig T. EEG microstates as a tool for studying the temporal  
449 dynamics of whole-brain neuronal networks: A review. *Neuroimage*. 2018;180(Pt  
450 B):577-593.
- 451 33. Kwang-Hyuk LE, P. N.' Brown, W. H.; Gregory, A. N.; Barker, A. T.; Woodruff, P. W.  
452 R. The role of the cerebellum in subsecond time perception: evidence from  
453 repetitive transcranial magnetic stimulation. *J Cogn Neurosci*. 2007;19(1):147-157.
- 454 34. Lewis PA, Miall RC. Brain activation patterns during measurement of sub- and  
455 supra-second intervals. *Neuropsychologia*. 2003;41(12):1583-1592.
- 456 35. Ohmae S, Medina JF. Climbing fibers encode a temporal-difference prediction  
457 error during cerebellar learning in mice. *Nat Neurosci*. 2015;18(12):1798-1803.
- 458 36. Ohmae S, Kunitatsu J, Tanaka M. Cerebellar Roles in Self-Timing for Sub- and  
459 Supra-Second Intervals. *J Neurosci*. 2017;37(13):3511-3522.
- 460 37. Maier WZ, A.; Wagner, M. Schizophrenia and bipolar disorder: differences and  
461 overlaps. *Curr Opin Psychiatry*. 2006;19(2):165-170.
- 462 38. Howells FM, Temmingh HS, Hsieh JH, van Dijen AV, Baldwin DS, Stein DJ.  
463 Electroencephalographic delta/alpha frequency activity differentiates psychotic  
464 disorders: a study of schizophrenia, bipolar disorder and methamphetamine-  
465 induced psychotic disorder. *Transl Psychiatry*. 2018;8(1):75.

466

467

**TABLE 1.** *Participant Demographics*

| Baseline Characteristic | Controls<br>(n=6) | Bipolar type I<br>(n=16) | Bipolar type II<br>(n=8) | p-value |
|-------------------------|-------------------|--------------------------|--------------------------|---------|
| Age                     |                   |                          |                          | 0.948   |
| Mean (SD)               | 37.2 (10.3)       | 37.2 (13.5)              | 35.5 (12.1)              |         |
| Sex                     |                   |                          |                          | 0.212   |
| Female                  | 3 (50%)           | 13 (81.25%)              | 7 (12.50%)               |         |
| Male                    | 3 (50%)           | 3 (18.75%)               | 1 (87.50%)               |         |
| Race                    |                   |                          |                          | 0.471   |
| White                   | 4 (66.67%)        | 12 (75%)                 | 6 (75%)                  |         |
| Black/African American  | 0 (0%)            | 3 (18.75%)               | 0 (0%)                   |         |
| Asian                   | 1 (16.67%)        | 0 (0%)                   | 1 (12.50%)               |         |
| Other                   | 1 (16.67%)        | 1 (6.25%)                | 1 (12.50%)               |         |
| Education               |                   |                          |                          | 0.138   |
| No High School          | 0 (0%)            | 2 (12.50%)               | 0 (0%)                   |         |
| High School             | 0 (0%)            | 5 (31.25%)               | 3 (37.50%)               |         |
| Associate's/Bachelor's  | 3 (50%)           | 7 (43.75%)               | 5 (62.50%)               |         |
| Post-Graduate           | 3 (50%)           | 2 (12.50%)               | 0 (0%)                   |         |
| Handedness              |                   |                          |                          | 0.126   |
| Right                   | 5 (83.33%)        | 16 (100%)                | 8 (100%)                 |         |
| Left                    | 1 (16.67%)        | 0 (0%)                   | 0 (0%)                   |         |

468

**TABLE 2.** *Comorbidities reported at enrollment*

| Comorbidity                              | N (%)      |
|------------------------------------------|------------|
| Generalized Anxiety Disorder             | 5 (20.8%)  |
| Post-Traumatic Stress Disorder           | 4 (16.67%) |
| Panic Disorder                           | 2 (8.33%)  |
| Borderline Personality Disorder          | 2 (8.33%)  |
| Attention-Deficit/Hyperactivity Disorder | 2 (8.33%)  |
| Migraine                                 | 1 (4.17%)  |
| Fibromyalgia                             | 1 (4.17%)  |
| Other Medical Condition                  | 5 (20.8%)  |

469

470

471

**TABLE 3.** *Medications at time of enrollment* 472

| Type of Medication                                | N (%)       | 473 |
|---------------------------------------------------|-------------|-----|
| Any antidepressant                                | 18 (75%)    |     |
| SSRI                                              | 4 (16.7%)   | 474 |
| SNRI                                              | 6 (25%)     |     |
| Atypical antidepressant                           | 11 (45.8%)  |     |
| Atypical antipsychotic                            | 14 (58.3%)  | 475 |
| Lithium                                           | 6 (25%)     |     |
| Benzodiazepine                                    | 10 (41.67%) | 476 |
| Stimulant                                         | 4 (16.7%)   |     |
| Anticonvulsant                                    | 11 (45.8%)  | 477 |
| Opioid                                            | 2 (8.3%)    |     |
| SSRI, selective serotonin reuptake inhibitor      |             | 478 |
| SNRI, selective norepinephrine reuptake inhibitor |             | 479 |

480

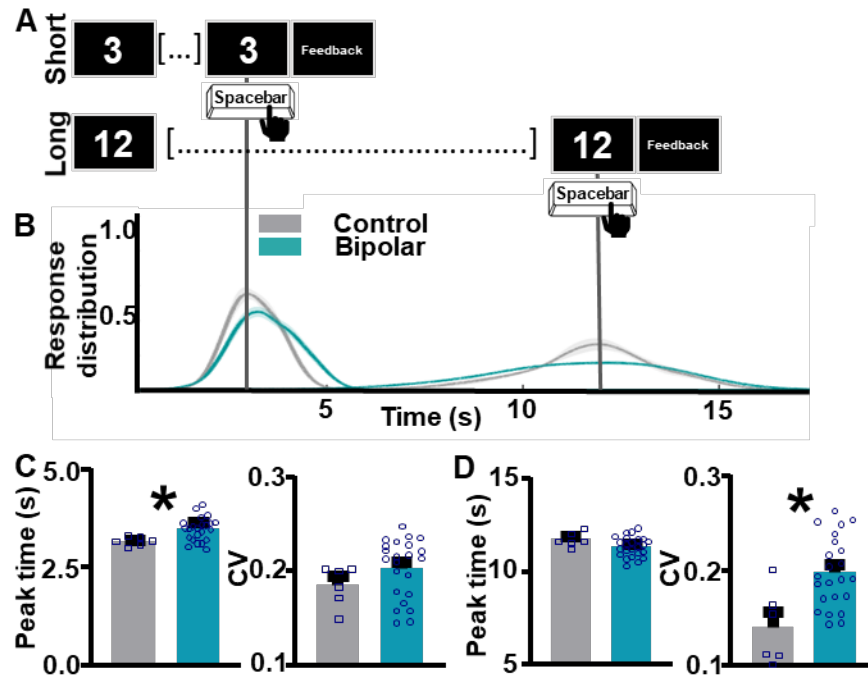

481

482 **Figure 1. Individuals with bipolar disorder show impairments in supra-second interval**

483 **timing.** **A.** Schematic diagram of supra-second interval timing task. Trials begin when

484 participants are shown a 3s or a 12s timing cue. Participants press the spacebar to indicate their

485 estimation of the target interval. **B.** Response distribution for neuronormative controls vs.

486 individuals with bipolar disorder. **C.** Individuals with bipolar disorder over-estimate the short

487 interval duration compared to controls [**left**]. No differences in response distribution were

488 detected [**right**]. **D.** Individuals with bipolar disorder do not differ from controls in estimation of

489 the long interval duration [**left**], however, individuals with bipolar disorder have a significantly

490 wider response distribution compared to controls [**right**]. Mean and standard error of the mean

491 plotted in bar graphs. Dots represent values from individual subjects. \*  $p < 0.05$

492

493



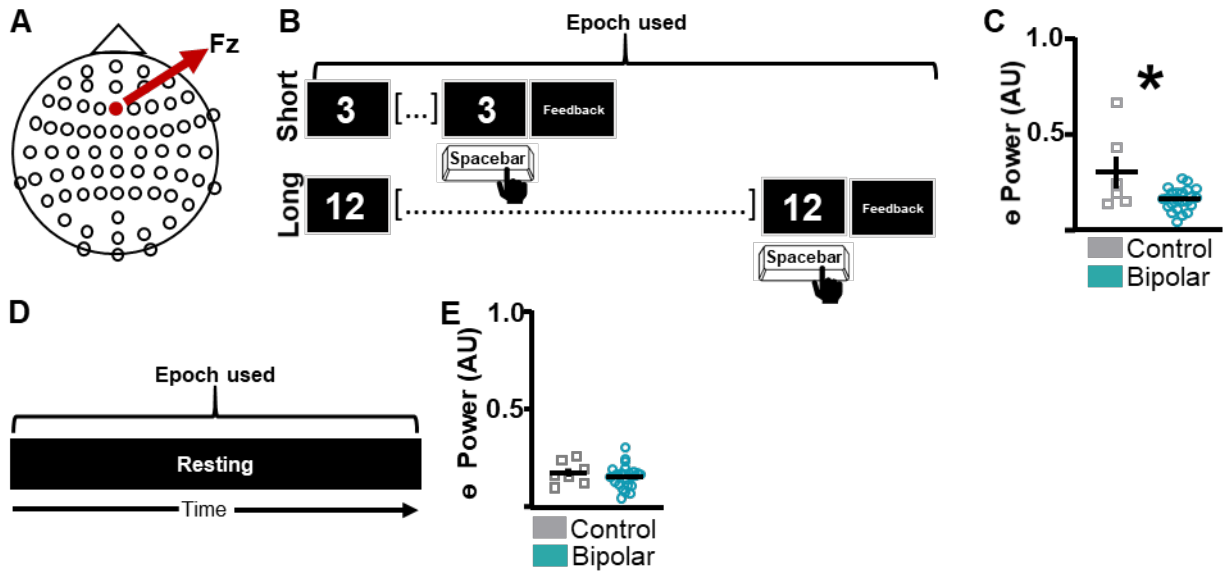

494

495 **Figure 2. Abnormal frontal theta power in individuals with bipolar disorder compared to**  
496 **neuronormative controls. A.** Schematic diagram of electrode cap used for data acquisition, with  
497 lead of interest (Fz) marked in red. **B.** To assess task-wide differences in oscillatory activity  
498 between bipolar disorder and neuronormative control groups data from the whole interval-timing  
499 task were analyzed. **C.** Individuals with bipolar disorder show lower theta power compared to  
500 individuals in the neuronormative control group during the supra-second interval timing task. **D.**  
501 To assess resting-state differences in oscillatory activity between bipolar disorder and  
502 neuronormative control groups data from the whole resting-state task were analyzed. **E.** No  
503 differences in resting-state theta power were identified between neuronormative control and  
504 bipolar groups. Mean and standard error of the mean plotted in bar graphs. Dots represent values  
505 from individual subjects. \*  $p < 0.05$

506

507

508

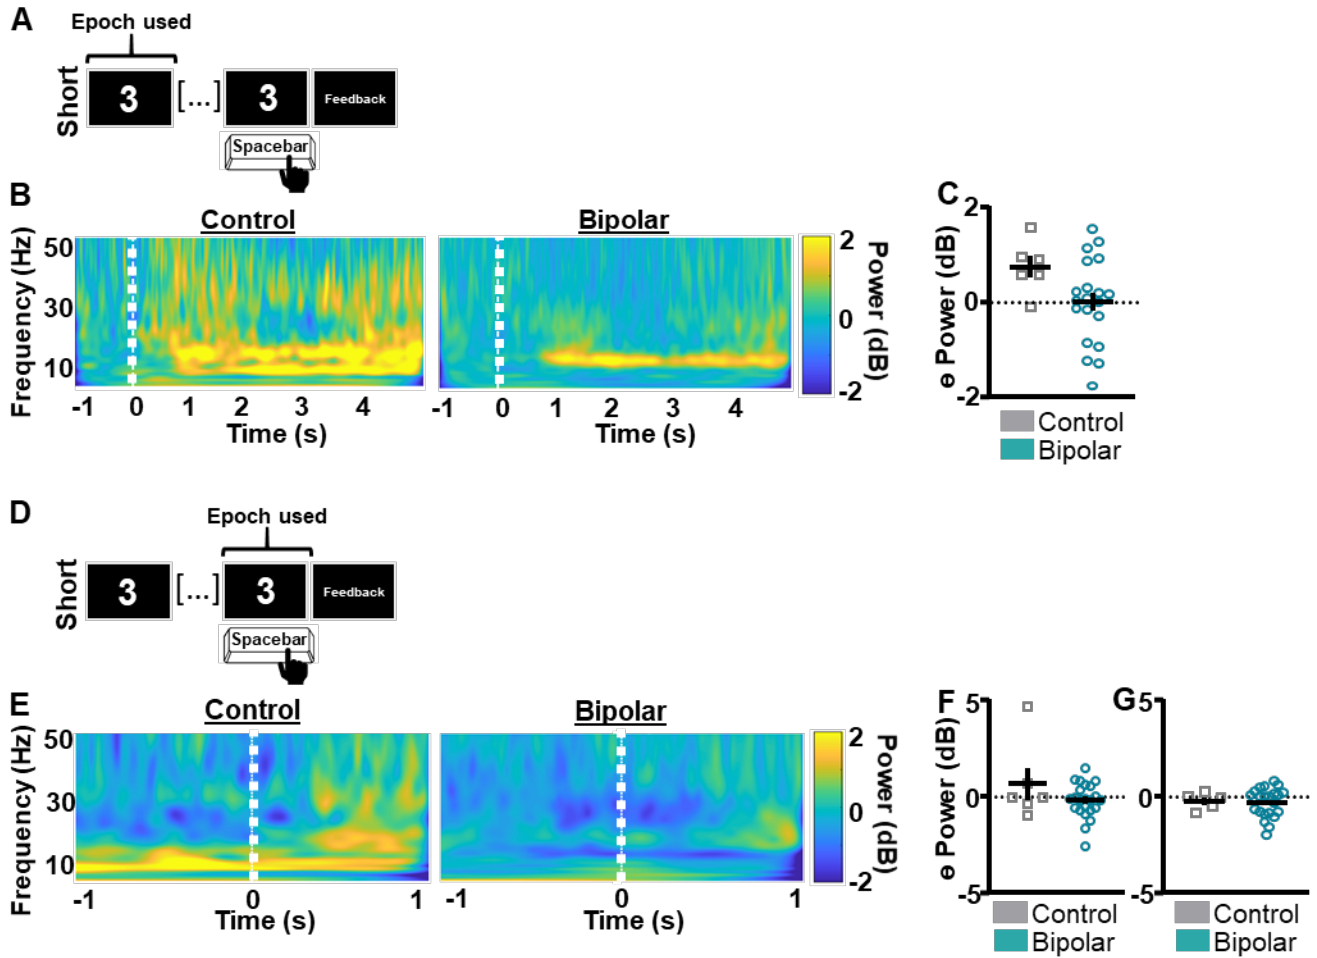

509

510 **Figure 3. Short interval oscillatory activity does not differ between bipolar and control**  
511 **groups.** **A.** Data were epoched around the presentation of the short interval timing cue. **B.**  
512 Averaged spectrogram of individuals in the control group [left] and the bipolar group [right].  
513 Exploratory analyses suggest that oscillatory activity does not differ between the two groups  
514 during the whole short interval epoch. **C.** ROI-based analyses indicate that theta power following  
515 the timing cue does not differ between bipolar and control groups. **D.** Data were epoched around  
516 the short interval button press. **E.** Averaged spectrogram of individuals in the control group [left]  
517 and the bipolar group [right]. Exploratory analyses suggest that oscillatory activity does not  
518 differ between the two groups. **F.** ROI-based analyses indicate that theta power prior to the

519 response does not differ between bipolar and control groups. **G.** ROI-based analyses indicate that  
520 theta power following the response does not differ between bipolar and control groups. Mean  
521 and standard error of the mean plotted in bar graphs. Dots represent values from individual  
522 subjects.

523

524

525

526

527

528

529

530

531

532

533

534

535

536

537

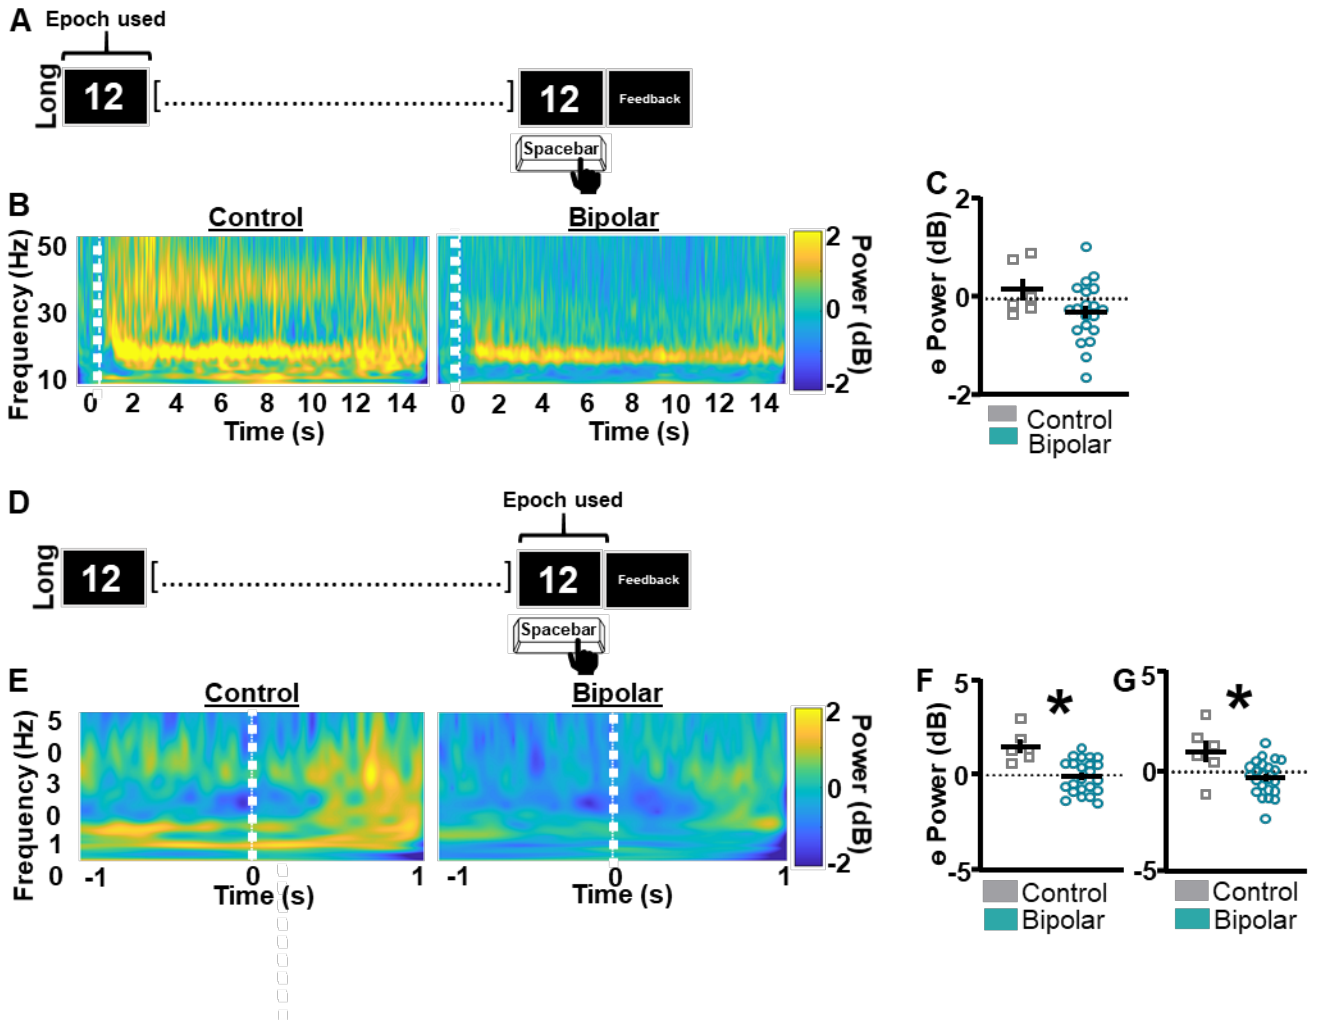

538

539 **Figure 4. Theta power surrounding the long interval response is lower in the bipolar group**

540 **compared to the control group. A.** Data were epoched around the presentation of the long

541 interval timing cue. **B.** Averaged spectrogram of individuals in the control group [left] and the

542 bipolar group [right]. Exploratory analyses suggest that oscillatory activity does not differ

543 between the two groups during the whole long interval epoch. **C.** ROI-based analyses indicate

544 that theta power following the timing cue does not differ between bipolar and control groups. **D.**

545 Data were epoched around the long interval button press. **E.** Averaged spectrogram of

546 individuals in the control group [left] and the bipolar group [right]. Exploratory analyses suggest

547 that oscillatory activity does not differ between the two groups. **F.** ROI-based analyses indicate

548 that theta power prior to the response was lower in the bipolar group compared to the control  
549 group. **G.** ROI-based analyses indicate that theta power following the response was lower in the  
550 bipolar group compared to the control group. Mean and standard error of the mean plotted in bar  
551 graphs. Dots represent values from individual subjects. \*  $p < 0.05$

552

553

554

555

556

557

558

559

560

561

562

563

564

565

566

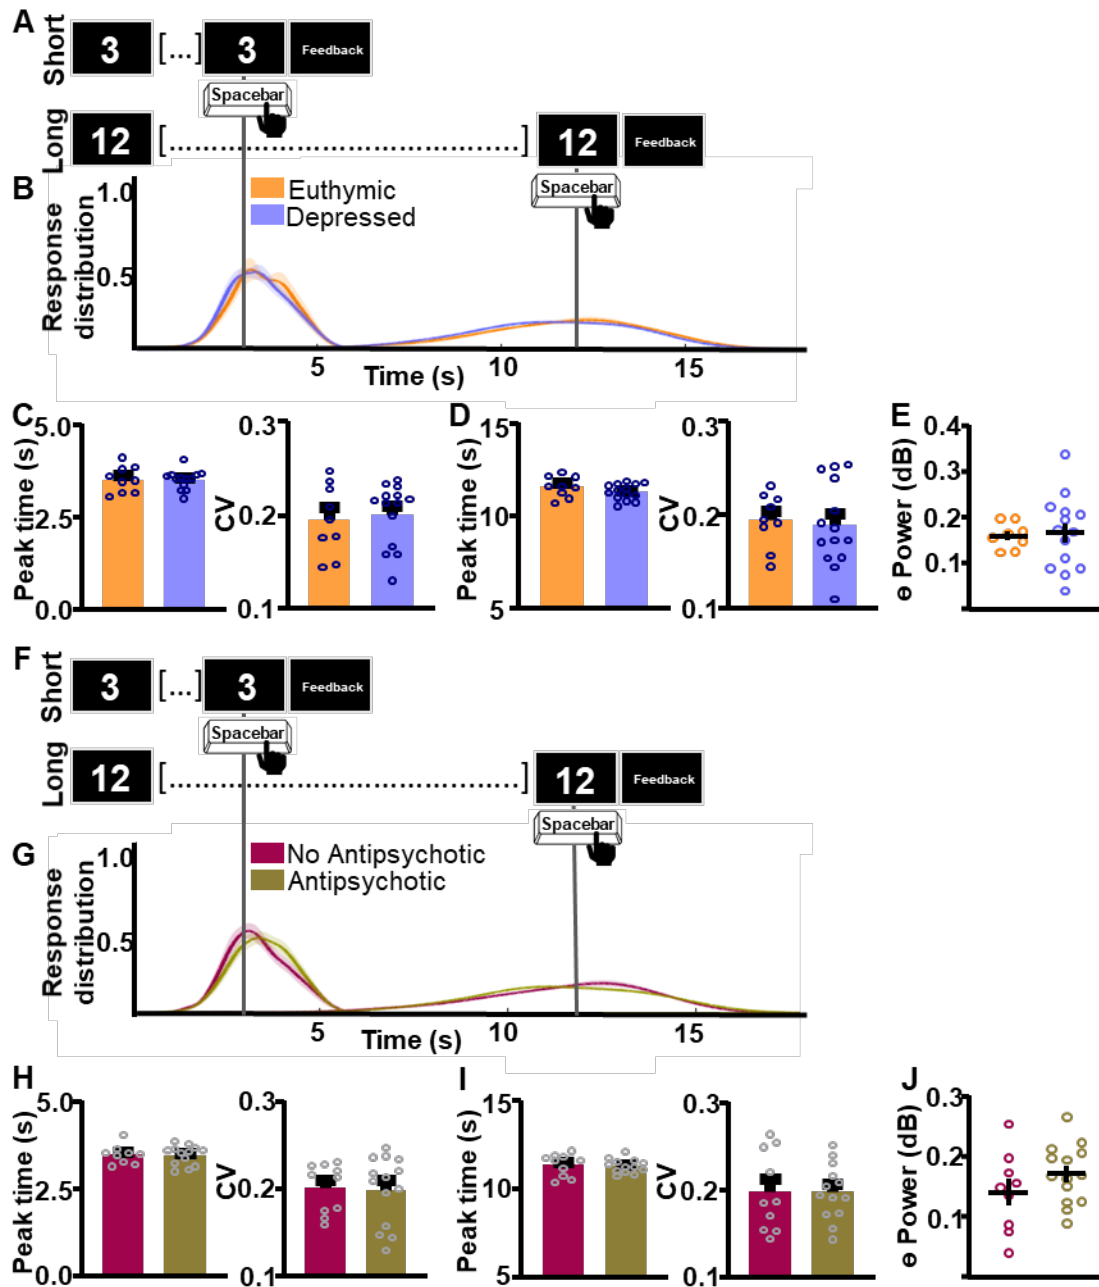

567

568 **Figure 5. Interval timing performance and frontal theta power do not differ as a function**  
569 **of mood or medication status. A.** To assess task-wide differences in oscillatory activity data  
570 from the whole interval-timing task were analyzed. **B.** Response distribution for individuals with  
571 bipolar disorder who were either euthymic or depressed at the time of data collection. **C-D.**  
572 Groups do not differ in time estimation for the short [**C**] or the long [**D**] intervals. **E.** Frontal

573 theta power during the ITT did not differ between groups. **F.** Response distribution for  
574 individuals with bipolar disorder divided by anti-psychotic medication status. **G-H.** Groups do  
575 not differ in time estimation for the short [**G**] or the long [**H**] intervals. **I.** Frontal theta power  
576 during the ITT did not differ between groups. Mean and standard error of the mean plotted in bar  
577 graphs. Dots represent values from individual subjects.

578

579

580

581

582
